# Supplementary material for: Evaluation of Arterial Stenosis in Head and Neck CTA Using a Novel Virtual Non-Calcium Reconstruction Algorithm with Photon-Counting CT
Source: Research Square preprint supplement (doi:10.21203/rs.3.rs-8591497/v1), 2026-02-11
Supplement: Supplementary file 1 [file b9ba697daee808fb835c8372.docx]

**
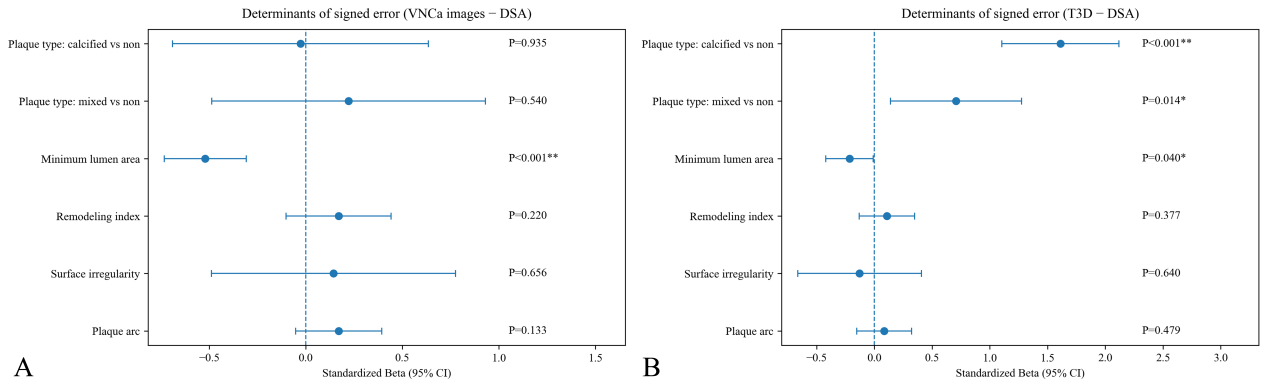
Supplementary Figure 1. Determinants of signed errors for VNCa images and T3D. (A) VNCa imaging model. (B) T3D model.**
